# Supplementary material
Source: PubMed Central journal article supplement (PMC7385903)
Supplement: NIHMS1600998-supplement-Supplementary_Table_S1.pdf [file NIHMS1600998-supplement-Supplementary_Table_S1.pdf]

| Variables                 | n  | Tumor tissues |      |       | Positive lymph nodes |      |       |
|---------------------------|----|---------------|------|-------|----------------------|------|-------|
|                           |    | Low           | High | P     | Low                  | High | P     |
| <b>Age(year)</b>          |    |               |      |       |                      |      |       |
| ≤60                       | 28 | 4             | 24   | 0.503 | 4                    | 24   | 0.534 |
| >60                       | 24 | 2             | 22   |       | 5                    | 19   |       |
| <b>Gender</b>             |    |               |      |       |                      |      |       |
| male                      | 37 | 4             | 33   | 0.796 | 7                    | 30   | 0.63  |
| female                    | 15 | 2             | 13   |       | 2                    | 13   |       |
| <b>pathological grade</b> |    |               |      |       |                      |      |       |
| I                         | 5  | 0             | 5    | 0.253 | 1                    | 4    | 0.273 |
| II                        | 37 | 6             | 31   |       | 8                    | 29   |       |
| III                       | 10 | 0             | 10   |       | 0                    | 10   |       |
